# Supplementary material for: Quantitative Comparison of Statistical Methods for Analyzing Human Metabolomics Data
Source: MDPI journal article supplement (doi:10.3390/metabo12060519), 2022-06-04

## SUPPLEMENTAL MATERIAL

**Table S1. Known Metabolite Compounds Assayed by the LC-MS Method Used**

| <b>Metabolite Type</b> | <b>Mass-to-Charge Ratio</b> | <b>ID</b>             |
|------------------------|-----------------------------|-----------------------|
| polar molecule         | 227.0645                    | DEOXYURIDINE          |
| free fatty acid        | 227.2012                    | Myristic Acid         |
| polar molecule         | 241.0738                    | LUMICHROME            |
| free fatty acid        | 241.2170                    | Pentadecanoic Acid    |
| polar molecule         | 242.0801                    | CYTIDINE              |
| free fatty acid        | 253.2172                    | Palmitoleic Acid      |
| free fatty acid        | 255.2329                    | Palmitic Acid         |
| eicosanoid             | 265.1812                    | tetranor 12(R) HETE   |
| polar molecule         | 267.0475                    | HOMOCYSTINE           |
| free fatty acid        | 267.2330                    | Heptadecaenoic Acid   |
| steroid                | 269.1758                    | Estrone               |
| free fatty acid        | 275.2020                    | Stearidonic Acid      |
| free fatty acid        | 277.2175                    | GAMMA-LINOLENATE      |
| free fatty acid        | 279.2331                    | LINOLEATE             |
| free fatty acid        | 281.2489                    | ELAIDATE              |
| eicosanoid             | 291.1967                    | 13S-HpOTrE(gamma)     |
| eicosanoid             | 293.2122                    | 13-oxoODE             |
| eicosanoid             | 293.2122                    | 9-oxoODE              |
| eicosanoid             | 295.2275                    | 9-HODE                |
| eicosanoid             | 299.2010                    | 15-oxoETE             |
| eicosanoid             | 299.2039                    | 5-oxoETE              |
| free fatty acid        | 301.2172                    | Eicosapentaenoic Acid |
| free fatty acid        | 303.2331                    | Arachidonic Acid      |
| free fatty acid        | 305.2486                    | Eicosatrienoic Acid   |
| free fatty acid        | 307.2644                    | Eicosadienoic Acid    |
| free fatty acid        | 309.2044                    | MYRISTATE             |
| free fatty acid        | 309.2798                    | Gondolic Acid         |
| free fatty acid        | 311.2955                    | ARACHIDATE            |
| free fatty acid        | 313.2387                    | PALMITOLEATE          |

|                 |          |                            |
|-----------------|----------|----------------------------|
| eicosanoid      | 315.1951 | 15-keto-PGA1               |
| eicosanoid      | 315.1964 | 13(S) HOTrE(y)             |
| eicosanoid      | 315.1971 | bicyclo PGE2               |
| eicosanoid      | 315.2000 | 5S-HpEPE                   |
| eicosanoid      | 315.2000 | 15d PGJ2                   |
| eicosanoid      | 317.2110 | HXA3                       |
| eicosanoid      | 317.2115 | 5(S) HEPE                  |
| eicosanoid      | 317.2117 | 18(S) HEPE                 |
| eicosanoid      | 317.2118 | 15(S) HEPE                 |
| eicosanoid      | 317.2121 | 14(15) EpETE               |
| eicosanoid      | 317.2128 | 12epi LTB4                 |
| eicosanoid      | 317.2136 | 5,15-diHETE                |
| eicosanoid      | 319.2260 | 16-HETE                    |
| eicosanoid      | 319.2278 | 11-HETE                    |
| eicosanoid      | 319.2283 | 14,15-EET                  |
| eicosanoid      | 319.2291 | 5,6-EET                    |
| eicosanoid      | 321.1712 | 11-dehydro-2,3-dinor-TXB2  |
| eicosanoid      | 321.2423 | 8(S) HETrE                 |
| eicosanoid      | 321.2435 | 15(S) HETrE                |
| polar molecule  | 323.0974 | CELLOBIOSE                 |
| endocannabinoid | 326.3038 | Stearoyl EA                |
| free fatty acid | 327.2326 | Docosahexaenoic Acid       |
| polar molecule  | 329.0161 | DEOXYURIDINE-MONOPHOSPHATE |
| eicosanoid      | 331.1890 | 9S-HpOTrE                  |
| steroid         | 331.1909 | Estradiol                  |
| eicosanoid      | 331.1916 | PGD3                       |
| eicosanoid      | 333.2061 | 8-iso-15-keto-PGF2alpha    |
| eicosanoid      | 333.2064 | PGA2                       |
| eicosanoid      | 333.2070 | 12oxo LTB4                 |
| eicosanoid      | 333.2070 | dhk PGE2                   |
| eicosanoid      | 333.2071 | 13,14-dihydro-15-keto-PGA2 |
| eicosanoid      | 333.2072 | ent-PGE2                   |
| eicosanoid      | 333.2074 | LXB4                       |
| eicosanoid      | 333.2077 | 20cooh AA                  |

|                 |          |                                 |
|-----------------|----------|---------------------------------|
| eicosanoid      | 333.2080 | 8-iso-PGA2                      |
| free fatty acid | 333.2811 | Docosatrienoic Acid             |
| eicosanoid      | 335.2222 | 15S-HpETE                       |
| eicosanoid      | 335.2226 | PGF2beta                        |
| eicosanoid      | 335.2228 | 8,12-iso-iPF2Å -VI-1,5-lactone  |
| eicosanoid      | 335.2228 | 14,15-DiHETE                    |
| eicosanoid      | 335.2228 | 8-iso-PGA1                      |
| eicosanoid      | 335.2232 | 15R-PGE1                        |
| eicosanoid      | 335.2234 | 15R-PGF2alpha                   |
| eicosanoid      | 335.2249 | 5,6-diHETE                      |
| free fatty acid | 335.2959 | Docosadienoic Acid              |
| free fatty acid | 337.3116 | ERUCATE                         |
| eicosanoid      | 339.2175 | 12-HHTrE                        |
| free fatty acid | 339.2533 | Linoleic Acid                   |
| free fatty acid | 339.3269 | Behenic Acid                    |
| eicosanoid      | 341.2163 | 17S-HpDHA                       |
| free fatty acid | 343.2853 | Stearic Acid                    |
| eicosanoid      | 351.2170 | 9-oxoOTrE                       |
| eicosanoid      | 351.2202 | 8-iso-PGE2                      |
| free fatty acid | 351.3270 | Tricosenoic Acid                |
| eicosanoid      | 353.2319 | 13(S) HOTrE                     |
| eicosanoid      | 353.2337 | 9(S) HOTrE                      |
| eicosanoid      | 353.2343 | 11b dhk PGF2a                   |
| free fatty acid | 353.3427 | TRICOSANOATE                    |
| eicosanoid      | 355.2486 | 13-HODE                         |
| eicosanoid      | 355.2486 | 12,13 EpOME                     |
| endocannabinoid | 358.2962 | Palmitoyl Ethanolamide          |
| endocannabinoid | 358.2966 | Palmitoyl EA or                 |
| steroid         | 359.1867 | Cortisone                       |
| eicosanoid      | 359.2222 | 5,6-diHETrE                     |
| free fatty acid | 359.2971 | Docosaenoic Acid                |
| eicosanoid      | 363.2556 | 1a,1b-dihomo-PGE1               |
| eicosanoid      | 363.2557 | dihomo PGF2a                    |
| polar molecule  | 364.0595 | CYTIDINE 2',3'-CYCLIC PHOSPHATE |

|                 |          |                                                      |
|-----------------|----------|------------------------------------------------------|
| free fatty acid | 365.2658 | STEARATE                                             |
| free fatty acid | 367.3583 | Lignoceric Acid                                      |
| bile acid       | 375.2906 | Lithocholic Acid                                     |
| eicosanoid      | 379.2486 | 15-HETE                                              |
| endocannabinoid | 382.2975 | Linoleoyl EA                                         |
| endocannabinoid | 384.3114 | Oleoyl Ethanolamide                                  |
| endocannabinoid | 384.3128 | Oleoyl EA                                            |
| free fatty acid | 387.3286 | Nervonic Acid                                        |
| steroid         | 389.2309 | 11-deoxycortisosterone<br>or 17a-hydroxyprogesterone |
| bile acid       | 389.2697 | Cholic Acid                                          |
| free fatty acid | 391.2850 | Adrenic Acid                                         |
| bile acid       | 391.2862 | Deoxycholic Acid                                     |
| bile acid       | 391.2863 | Ursodeoxycholic acid                                 |
| eicosanoid      | 393.2280 | 15d PGD2                                             |
| eicosanoid      | 393.2294 | PGB2                                                 |
| eicosanoid      | 395.2429 | LTB4                                                 |
| eicosanoid      | 395.2433 | 15-epi-PGA1                                          |
| eicosanoid      | 395.2442 | PGA1                                                 |
| eicosanoid      | 395.2445 | 12,13 diHOME                                         |
| polar molecule  | 397.3365 | ERUCATE                                              |
| polar molecule  | 401.1297 | PALATINOSE                                           |
| eicosanoid      | 403.2485 | 15 oxoEDE                                            |
| eicosanoid      | 403.2500 | 14 HDoHE                                             |
| steroid         | 405.2265 | Unk                                                  |
| steroid         | 405.2271 | Unk                                                  |
| steroid         | 405.2277 | 11-deoxycortisol                                     |
| steroid         | 405.2287 | Unk                                                  |
| steroid         | 405.2295 | CORTEXOLONE                                          |
| polar molecule  | 407.0623 | INOSINE MONOPHOSPHATE                                |
| bile acid       | 407.2804 | b-Muricholic Acid                                    |
| eicosanoid      | 411.2365 | 6S-LXA4                                              |
| endocannabinoid | 415.3076 | OLEOYL-GLYCEROL                                      |
| eicosanoid      | 417.2246 | 12S-HpETE                                            |

|                 |          |                              |
|-----------------|----------|------------------------------|
| eicosanoid      | 417.2284 | 8,15-diHETE                  |
| steroid         | 419.2078 | CORTISONE                    |
| steroid         | 421.2239 | CORTISOL                     |
| steroid         | 421.2241 | Cortisol                     |
| endocannabinoid | 423.3101 | 2-AG ether                   |
| steroid         | 425.2547 | allo-Tetrahydrocortisol      |
| free fatty acid | 425.3617 | NERVONATE                    |
| bile acid       | 430.2965 | Glycodeoxycholic Acid        |
| endocannabinoid | 430.3028 | Docosahexanoyl EA            |
| bile acid       | 435.3122 | LITHOCHOLATE                 |
| endocannabinoid | 437.2899 | 2-AG maybe                   |
| bile acid       | 448.3074 | Glycoursodeoxycholic Acid    |
| eicosanoid      | 451.2348 | 6k PGF1a                     |
| bile acid       | 451.3071 | Chenodeoxycholic acid        |
| bile acid       | 464.3021 | GLYCOCHOLATE                 |
| bile acid       | 470.2848 | Glycochenodeoxycholic Acid   |
| bile acid       | 480.2745 | Tauroursodeoxycholic acid    |
| eicosanoid      | 495.2607 | 14,15 LTD4                   |
| bile acid       | 498.2904 | Taurodeoxycholic Acid        |
| bile acid       | 514.2843 | Taurocholic Acid             |
| bile acid       | 520.2656 | Taurochenodeoxycholic acid   |
| polar molecule  | 540.0464 | ADENOSINE DIPHOSPHATE RIBOSE |
| polar molecule  | 610.0507 | ADP-GLUCOSE                  |

---

**Figure S1.** For analyses of continuous outcome (Panel A) and binary outcome (Panel B), the sensitivity, specificity, positive predictive value (PPV), negative predictive value (NPV), and false positive rate are displayed (as percent color fill of each bar) for each statistical method, reflecting their ability to correctly identify the top ten simulated metabolite associations, across varying numbers of total metabolite measures (M=200, or M=2000) in smaller-sized study samples collected from varying numbers of study subjects (N=50, N=100, N=200, N=1000, or N=5000). PCR, principal components regression; BON, Bonferroni; FDR, false discovery rate; LASSO, lease absolute shrinkage and selection operator; SPLS, sparse partial least squares; RF, random forests.

**A.**

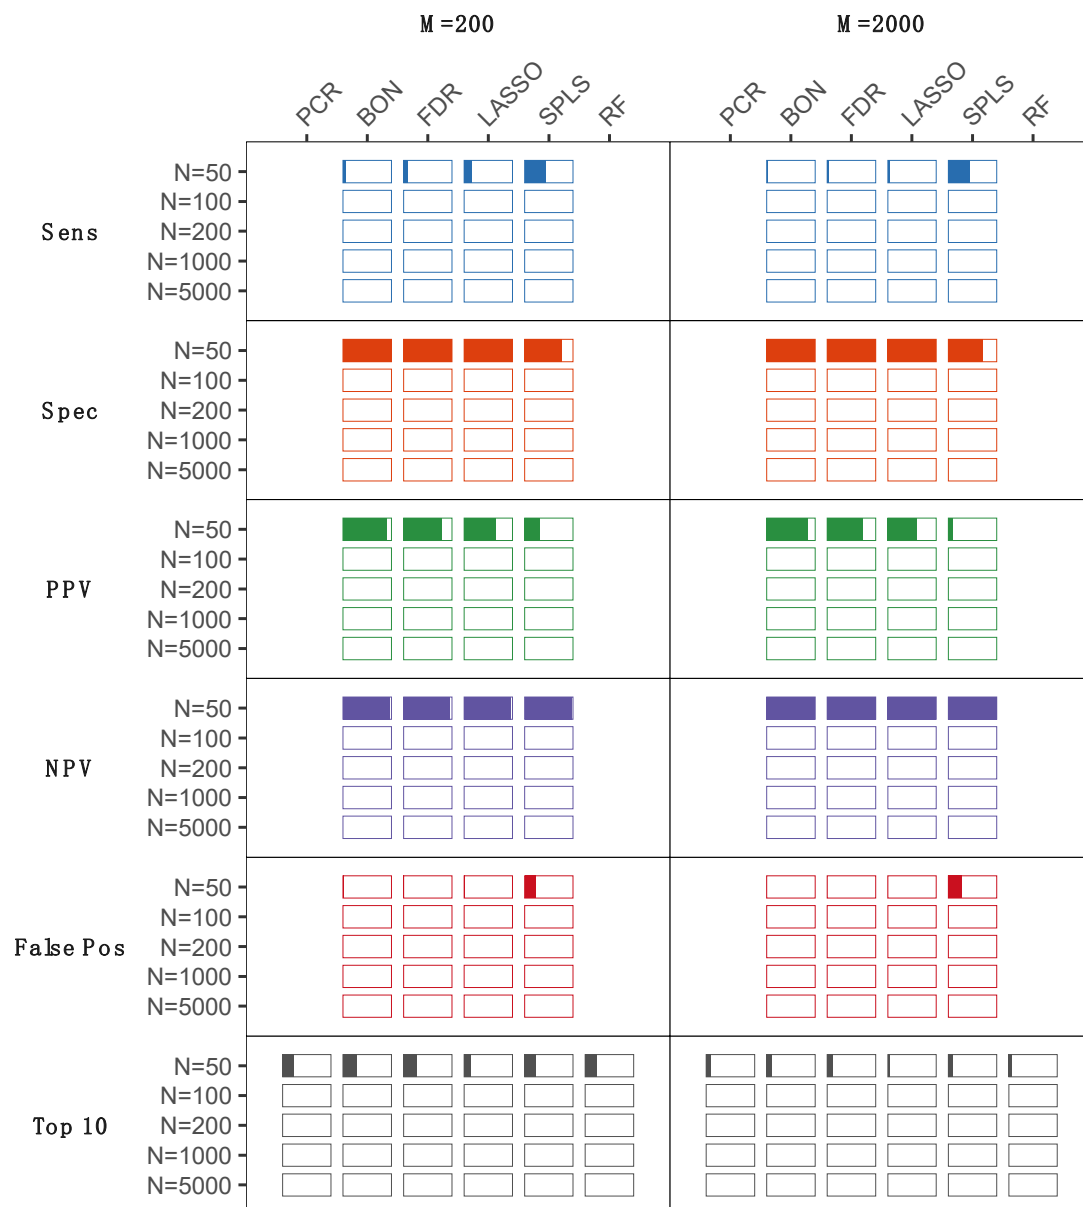

**B.**

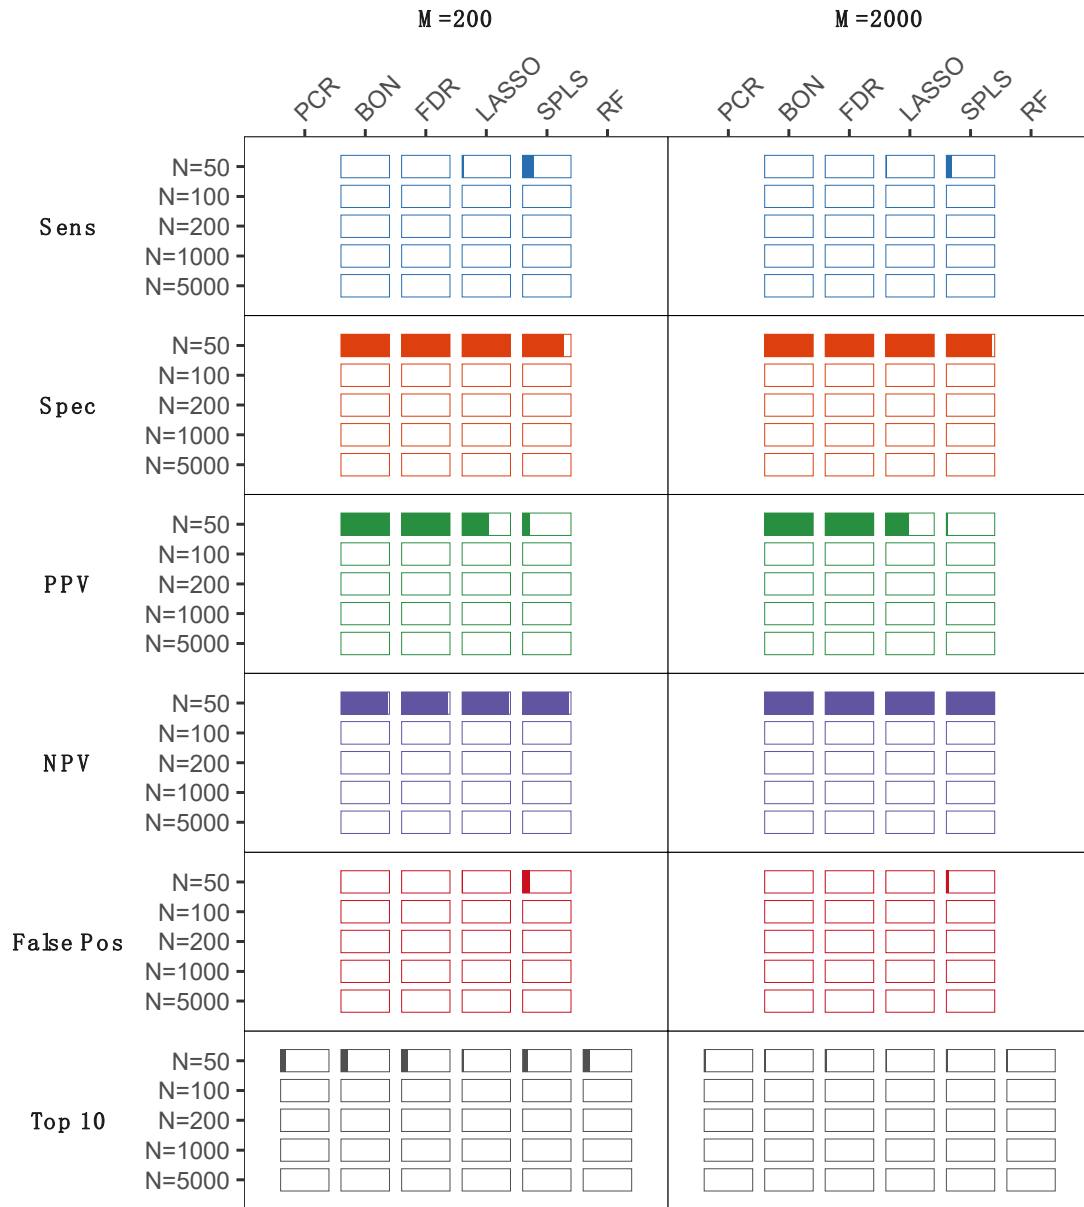

**Figure S2. Estimates of power to detect metabolites associated with a continuous outcome for a given effect size based on simulations.** The estimated power to detect the top ten metabolite associations per effect size is shown for each statistical method, across varying numbers of total metabolite measures ( $M=200$ , or  $M=2000$ ) in study samples collected from varying numbers of study subjects ( $N=200$ ,  $N=1000$ , or  $N=5000$ ). BON, Bonferroni; FDR, false discovery rate; LASSO, least absolute shrinkage and selection operator; SPLS, sparse partial least squares.

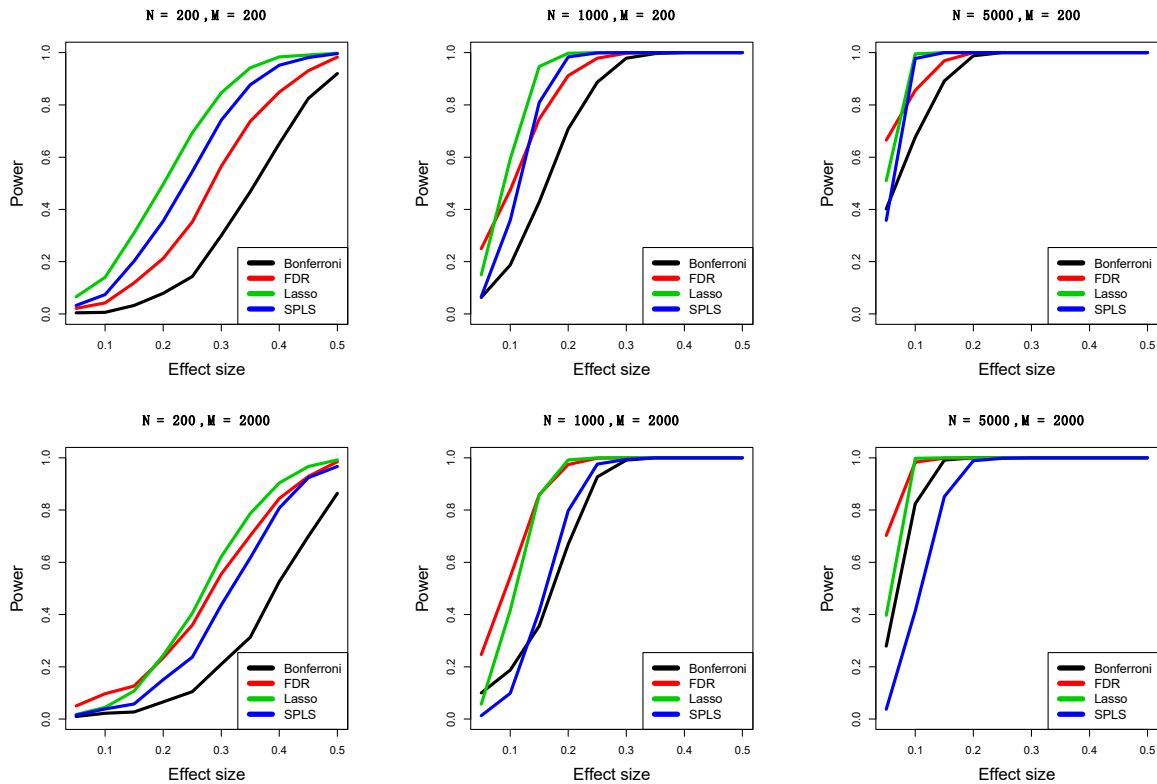



**Figure S3. Estimates of power to detect metabolites associated with a binary outcome for a given effect size based on simulations.** The estimated power to detect the top ten metabolite associations per effect size is shown for each statistical method, across varying numbers of total metabolite measures ( $M=200$ , or  $M=2000$ ) in study samples collected from varying numbers of study subjects ( $N=200$ ,  $N=1000$ , or  $N=5000$ ). BON, Bonferroni; FDR, false discovery rate; LASSO, least absolute shrinkage and selection operator; SPLS, sparse partial least squares.

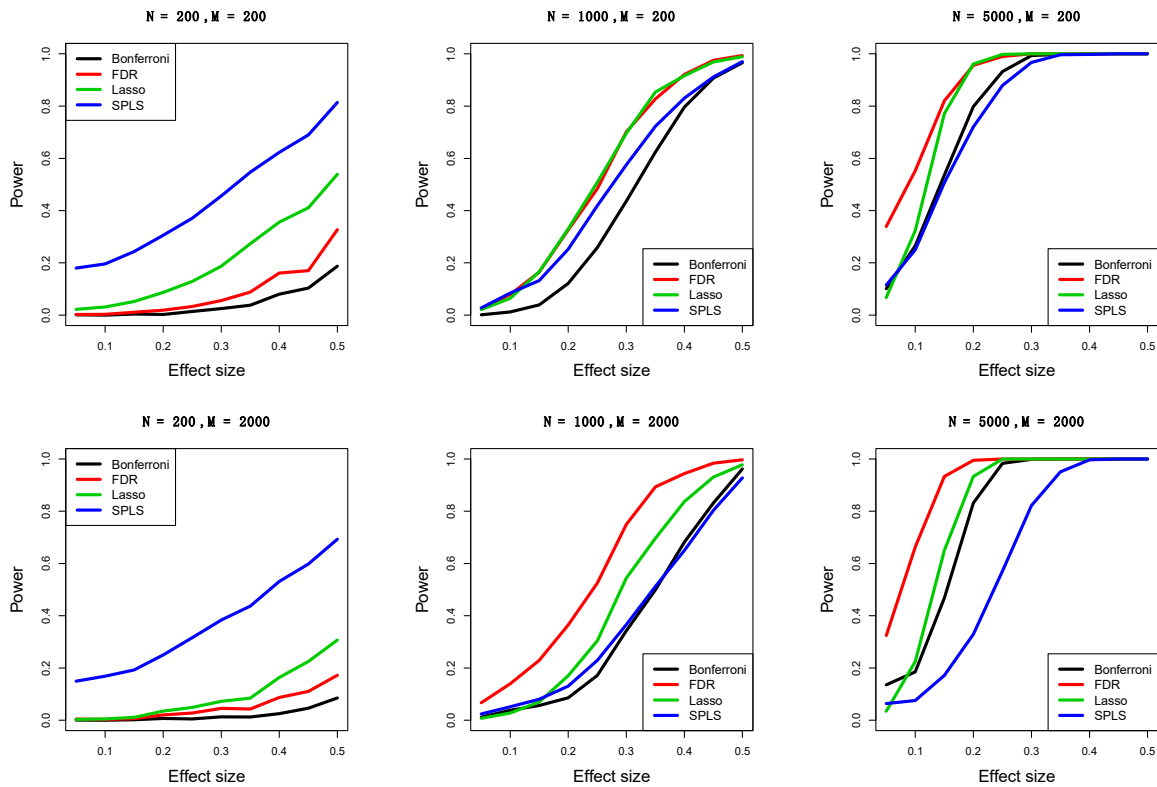

**Figure S4. Results for a continuous outcome based on simulations with positive and negative inter-metabolite correlations.** The sensitivity, specificity, positive predictive value (PPV), negative predictive value (NPV), and false positive rate are displayed (as percent color fill of each bar) for each statistical method, reflecting their ability to correctly identify the top ten simulated metabolite associations, across varying numbers of total metabolite measures (M=200, or M=2000) in study samples collected from varying numbers of study subjects (N=200, N=1000, or N=5000). PCR, principal components regression; BON, Bonferroni; FDR, false discovery rate; LASSO, least absolute shrinkage and selection operator; SPLS, sparse partial least squares; RF, random forests.

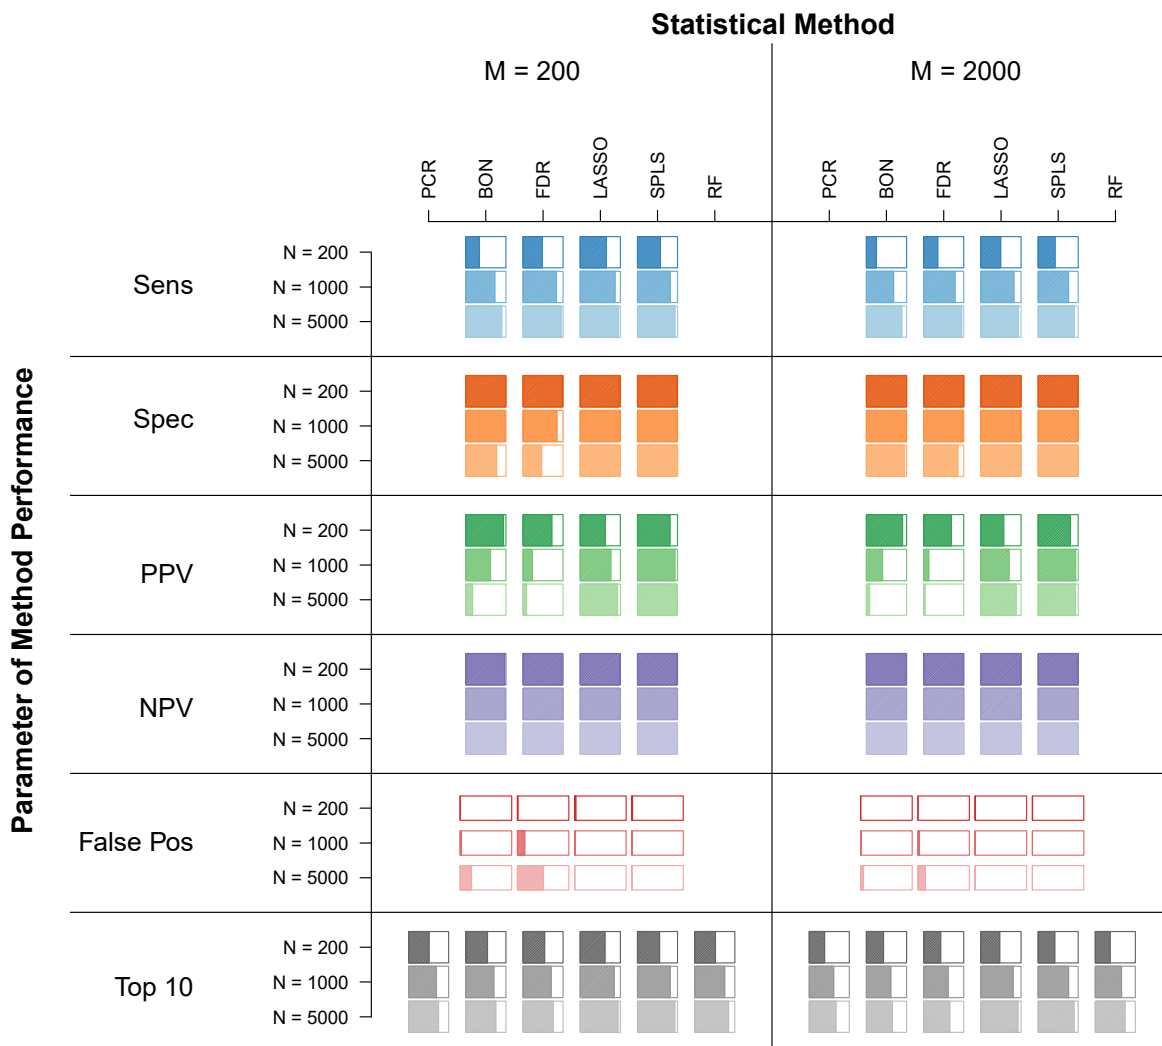

**Figure S5. Results for a binary outcome based on simulations with positive and negative inter-metabolite correlations.** The sensitivity, specificity, positive predictive value (PPV), negative predictive value (NPV), and false positive rate are displayed (as percent color fill of each bar) for each statistical method, reflecting their ability to correctly identify the top ten simulated metabolite associations, across varying numbers of total metabolite measures (M=200, or M=2000) in study samples collected from varying numbers of study subjects (N=200, N=1000, or N=5000). PCR, principal components regression; BON, Bonferroni; FDR, false discovery rate; LASSO, least absolute shrinkage and selection operator; SPLS, sparse partial least squares; RF, random forests.

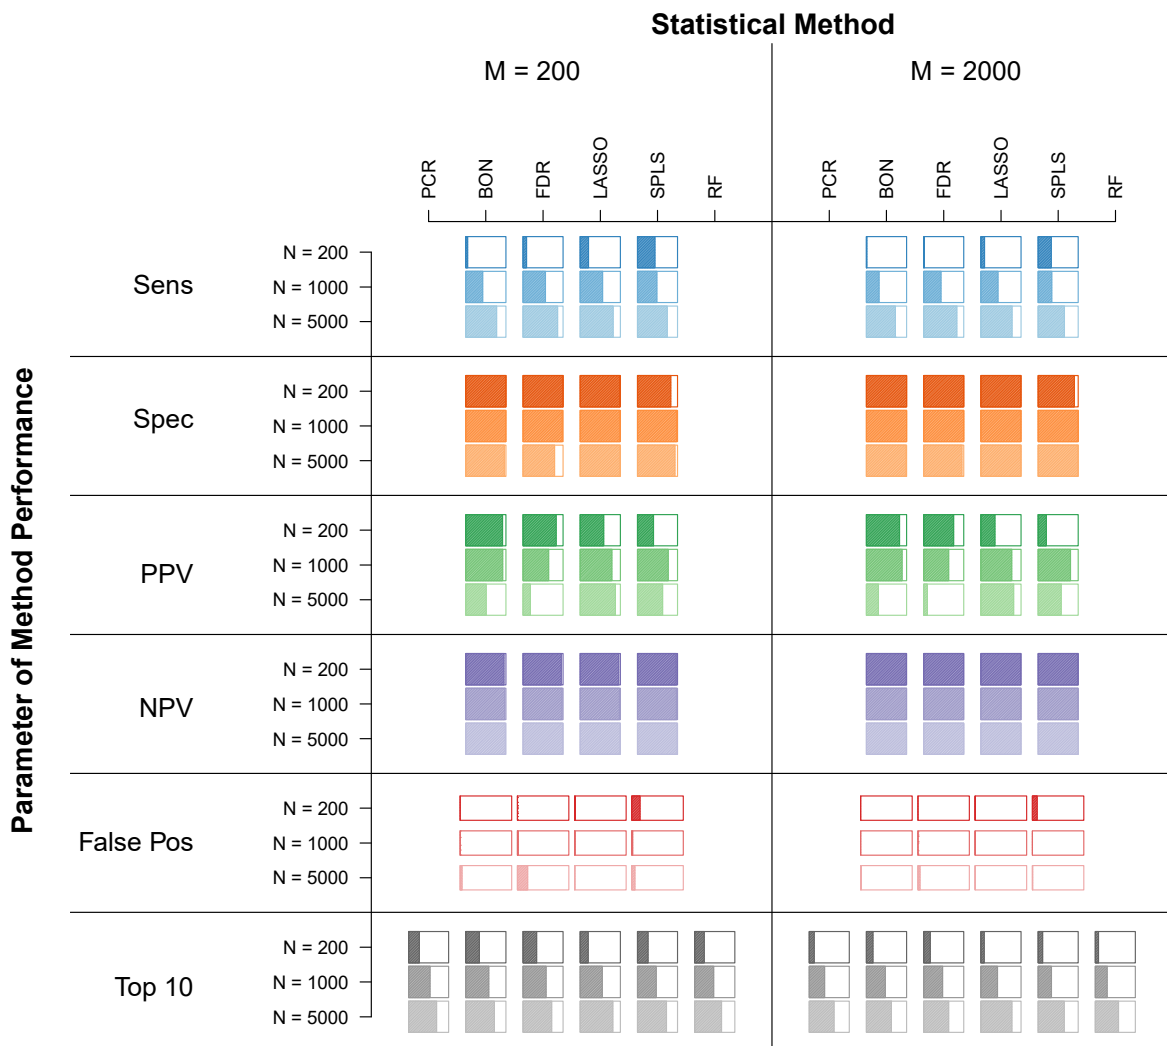

**Figure S6. Results for a continuous outcome based on simulations with highly correlated important covariates.** The sensitivity, specificity, positive predictive value (PPV), negative predictive value (NPV), and false positive rate are displayed (as percent color fill of each bar) for each statistical method, reflecting their ability to correctly identify the top ten simulated metabolite associations, across varying numbers of total metabolite measures (M=200, or M=2000) in study samples collected from varying numbers of study subjects (N=200, N=1000, or N=5000). PCR, principal components regression; BON, Bonferroni; FDR, false discovery rate; LASSO, least absolute shrinkage and selection operator; SPLS, sparse partial least squares; RF, random forests.

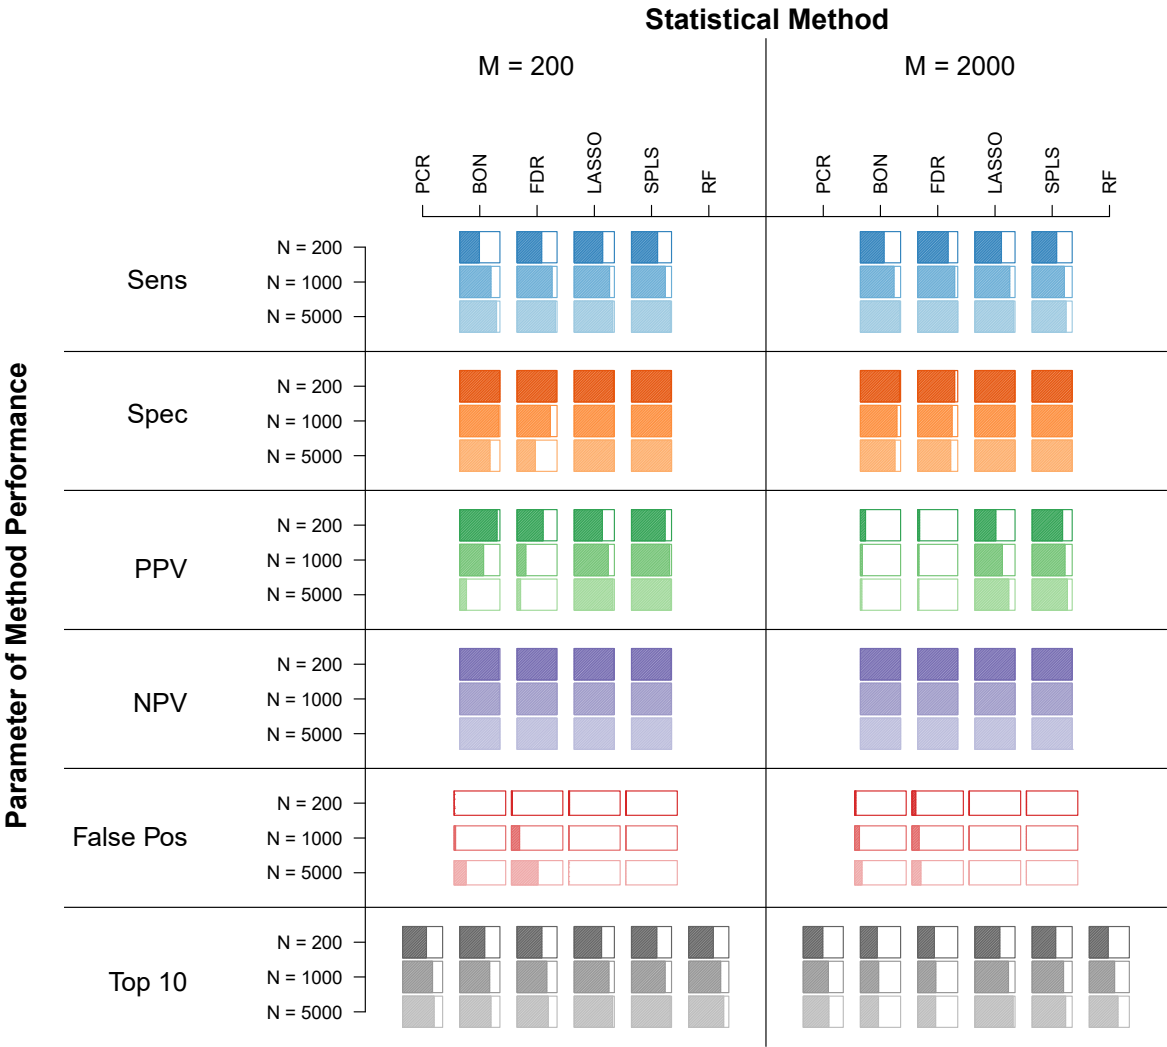

**Figure S7. Results for a binary outcome based on simulations with highly correlated important covariates.** The sensitivity, specificity, positive predictive value (PPV), negative predictive value (NPV), and false positive rate are displayed (as percent color fill of each bar) for each statistical method, reflecting their ability to correctly identify the top ten simulated metabolite associations, across varying numbers of total metabolite measures (M=200, or M=2000) in study samples collected from varying numbers of study subjects (N=200, N=1000, or N=5000). PCR, principal components regression; BON, Bonferroni; FDR, false discovery rate; LASSO, least absolute shrinkage and selection operator; SPLS, sparse partial least squares; RF, random forests.

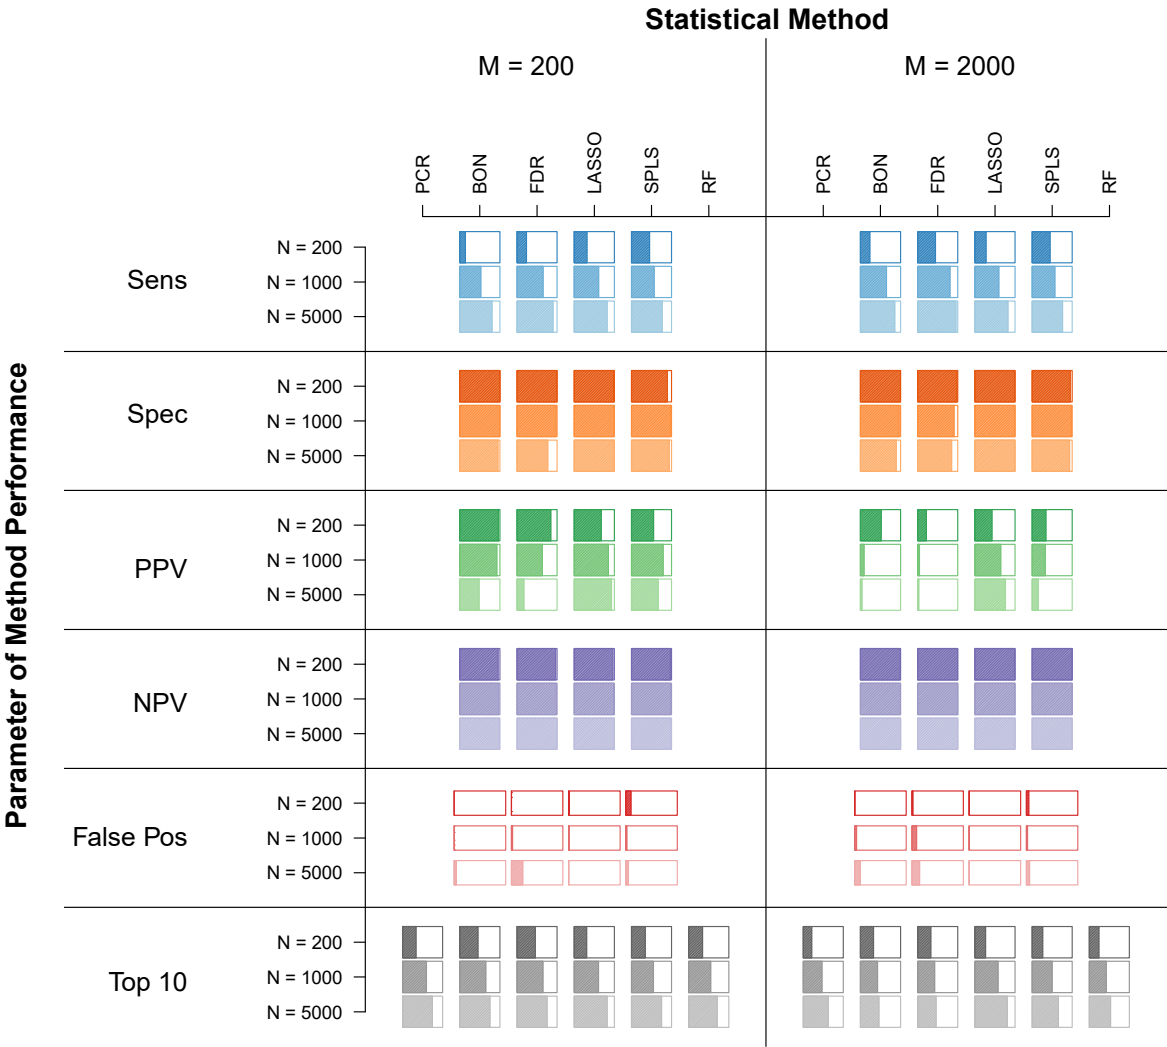

**Figure S8. Results of analyzing actual, experimentally derived metabolomics data while controlling for batch effects.** The number of metabolites found in association with age (continuous outcome) and sex (binary outcome) from experimentally derived metabolomics studies (see text) for different statistical methods applied: false discovery rate (FDR), sparse partial least squares (SPLS), and least absolute shrinkage and selection operator (LASSO). The number of metabolite correlates found in common by the different methods is relatively small compared to the total number of apparently significantly associated metabolites.

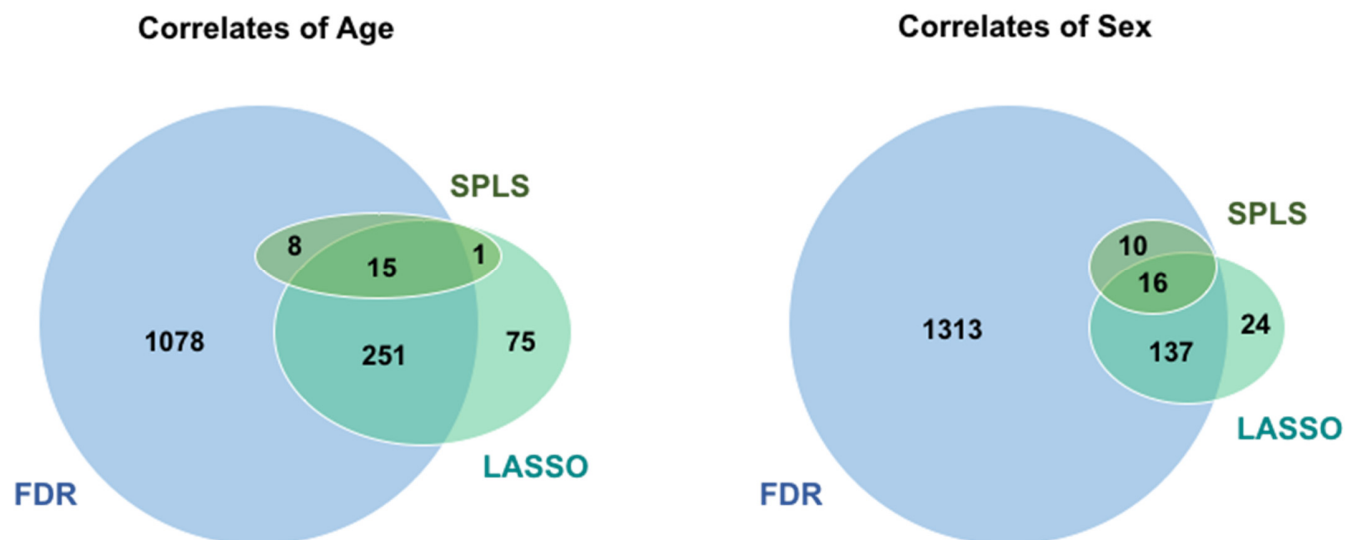

Supplement: s1 [file s1]
